# Supplementary material for: Flavin-mediated photoactivation of Pt(iv) anticancer complexes: computational insights on the catalytic mechanism
Source: Royal Society of Chemistry journal article supplement (doi:10.1039/d1cp05507k), 2022-01-01
Supplement: d1cp05507k1.pdf [file d1cp05507k1.pdf]

## Flavin-Mediated Photoactivation Of Pt(IV) Anticancer Complexes: Computational Insights On The Catalytic Mechanism

Stefano Scoditti,<sup>a</sup> Eslam Dabbish,<sup>a</sup> German E. Pieslinger,<sup>b</sup> Elixabete Rezabal,<sup>c,d</sup> Xabier Lopez,<sup>c,d</sup>  
Emilia Sicilia,<sup>\*a</sup> Luca Salassa<sup>\*c,d,e</sup>

<sup>a</sup> *Department of Chemistry and Chemical Technologies, Università della Calabria, Arcavacata di Rende (CS), 87036, Italy*

<sup>b</sup> *CONICET – Universidad de Buenos Aires, Instituto de Química y Fisicoquímica Biológicas (IQUIFIB), Buenos Aires, Argentina*

<sup>c</sup> *Donostia International Physics Center, Paseo Manuel de Lardizabal 4, Donostia, 20018, Spain*

<sup>d</sup> *Polimero eta Material Aurreratuak: Fisika, Kimika eta Teknologia, Kimika Fakultatea, Euskal Herriko Unibertsitatea UPV/EHU, Paseo Manuel de Lardizabal 3, Donostia, 20018, Spain*

<sup>e</sup> *Ikerbasque, Basque Foundation for Science, Bilbao, 48011, Spain*

Electronic Supplementary Material (ESI)

**Table S1** Imaginary frequencies for all computed transition states.

| <b>NADH:Rf → NAD<sup>+</sup>:RfH<sup>-</sup></b>                      |          |
|-----------------------------------------------------------------------|----------|
| <sup>1</sup> TS                                                       | -1544.79 |
| <sup>3</sup> TS                                                       | -506.97  |
| <b>RfH<sup>-</sup>:Pt(IV) → Rf:Pt(II) – Complex 1</b>                 |          |
| TS (Pt–O1 attack)                                                     | -111.31  |
| TS (acetyl O2 attack)                                                 | -592.10  |
| <b>RfH<sup>-</sup>:Pt(IV) → Rf:Pt(II) – Complex 2</b>                 |          |
| TS (Pt–O1 attack)                                                     | -113.23  |
| TS (acetyl O2 attack)                                                 | -113.15  |
| <b>NADH:Pt(IV) → NAD<sup>+</sup>:Pt(II) – Complex 1</b>               |          |
| TS (Pt–O1 attack)                                                     | -1265.22 |
| TS (acetyl O2 attack)                                                 | -1194.61 |
| <b>NADH:Pt(IV) → NAD<sup>+</sup>:Pt(II) – Complex 2</b>               |          |
| TS (Pt–O1 attack)                                                     | -1352.04 |
| TS (acetyl O2 attack)                                                 | -1139.99 |
| <b>AscH<sup>-</sup>:Pt(IV) → DHAsc<sup>‡</sup>:Pt(II) – Complex 1</b> |          |
| TS (Pt–O1 attack)                                                     | -1141.66 |
| TS (acetyl O2 attack)                                                 | -189.16  |
| <b>AscH<sup>-</sup>:Pt(IV) → DHAsc<sup>‡</sup>:Pt(II) – Complex 2</b> |          |
| TS (Pt–O1 attack)                                                     | -655.29  |
| TS (acetyl O2 attack)                                                 | -194.17  |

<sup>‡</sup> DHAsc = Dehydroascorbate

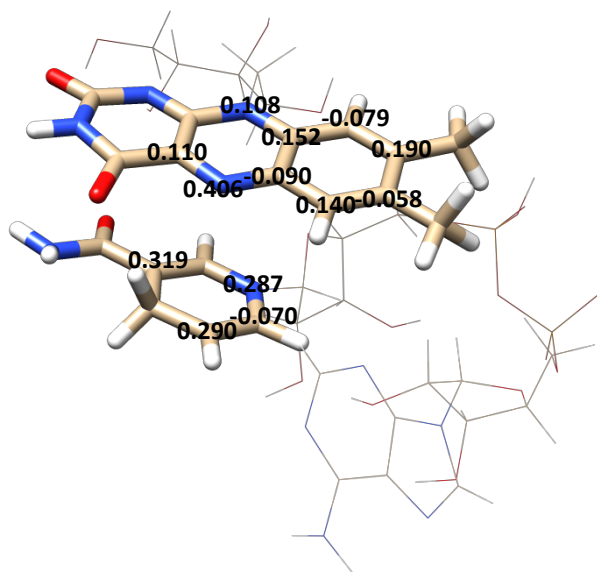

**Fig. S1** Mulliken spin density of the initial adduct  $^3[\text{NADH:Rf}]$  for atoms having values  $> 0.100$  or  $< -0.050$ .

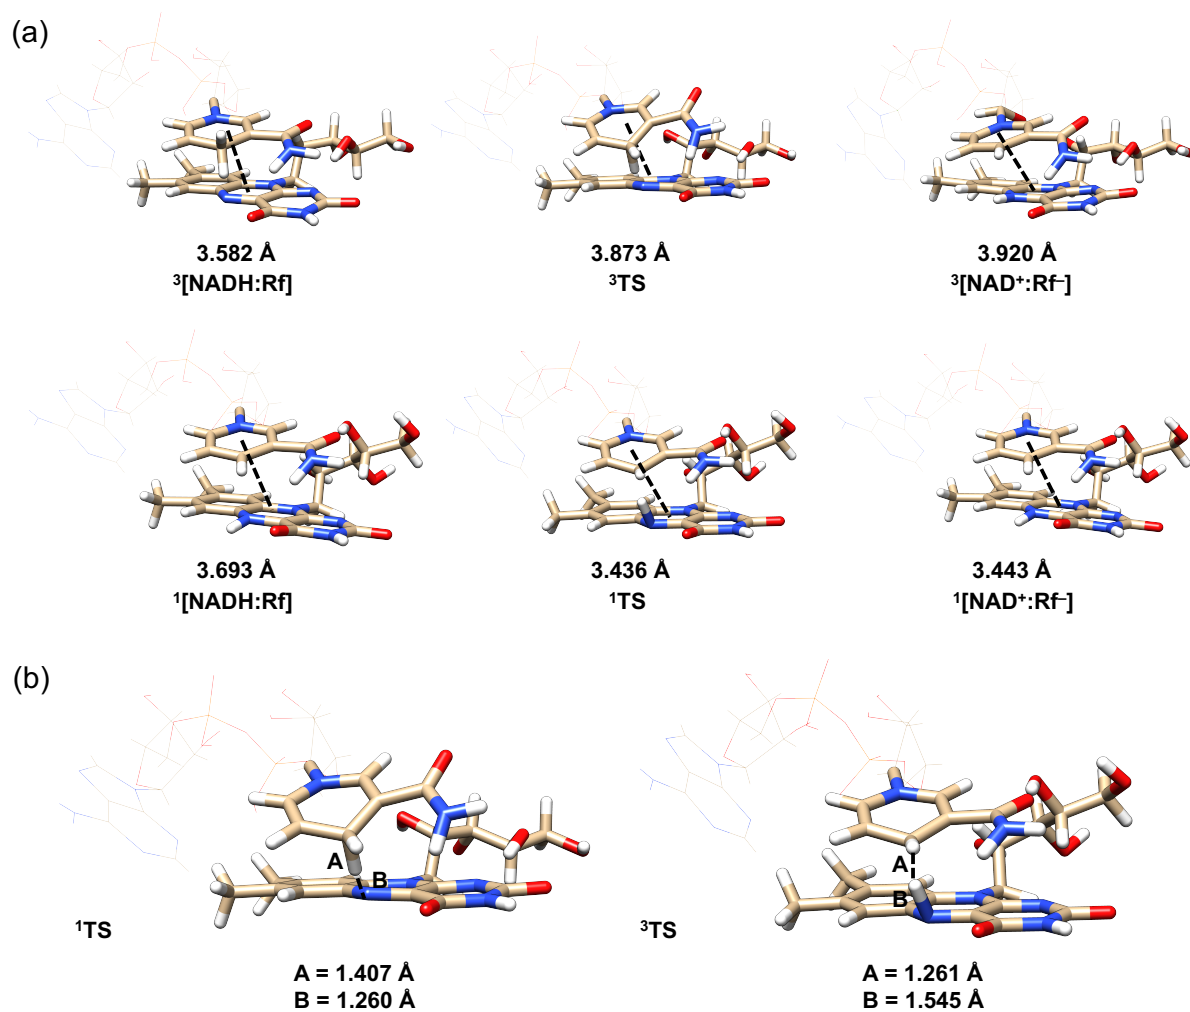

**Fig. S2** Calculated models for the reaction between NADH and Rf in both singlet ground and triplet excited-states. Distances between the stacked adducts are shown in (a), while (b) reports the C(6)<sub>NAD</sub>-H-N(5)<sub>Rf</sub> bond lengths.

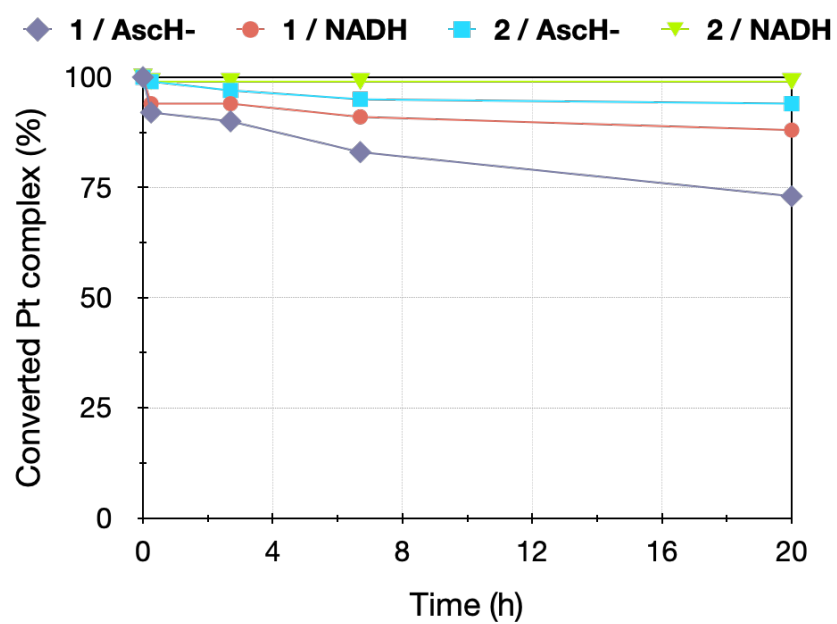

**Fig. S3** Experimental reduction rates of **1** and **2** for AscH<sup>-</sup> and NADH over 20 h in the dark. Reactions were performed in PB buffer (10 mM, pH 7.4) using 1 mM of reducing agent. Under similar experimental conditions, light-generated RfH<sup>-</sup> (catalytic, 5% catalyst load) achieves full conversion of the two complexes in less than 4 min.<sup>1</sup>

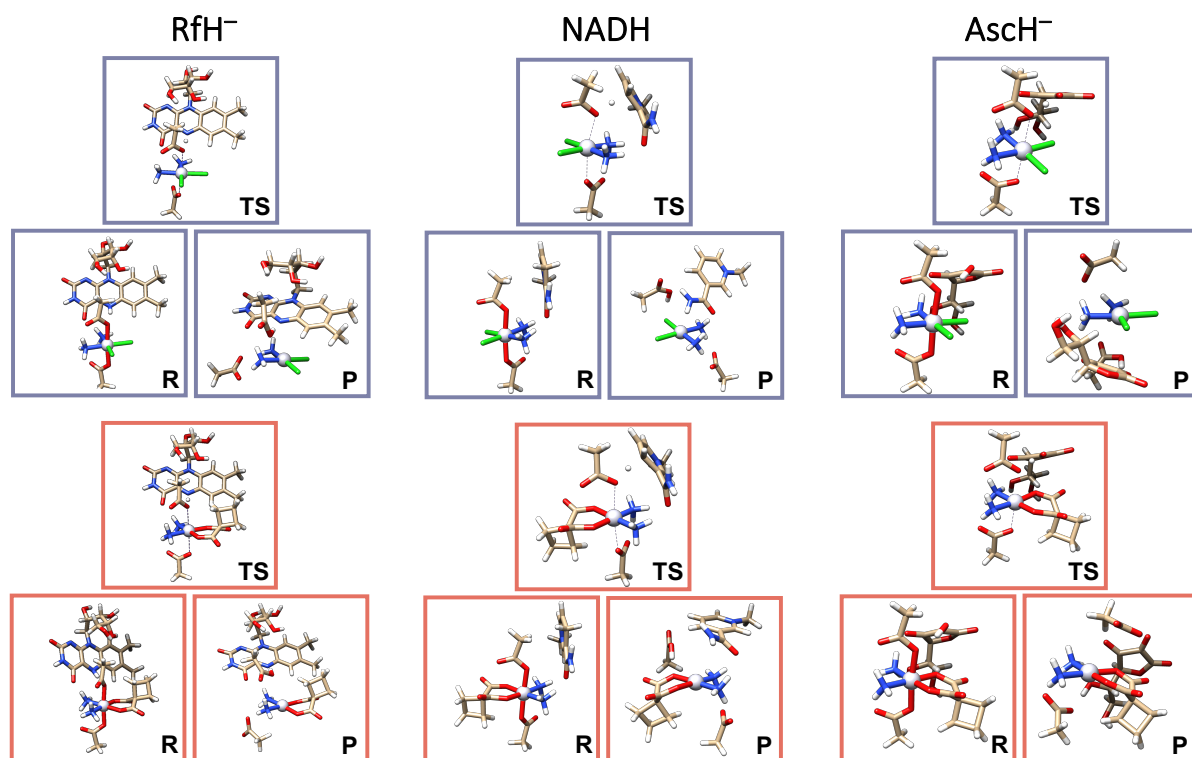

**Fig. S4** Models of initial adduct (R), transition state (TS) and product (P) for the reduction of complexes **1** (violet) and **2** (red) by RfH<sup>-</sup>, NADH and AscH<sup>-</sup>. Optimized geometries were obtained assuming that the Pt-coordinated O(1) atom of an axial acetato ligands of **1** and **2** interacts with the hydride donating moiety of the donor.

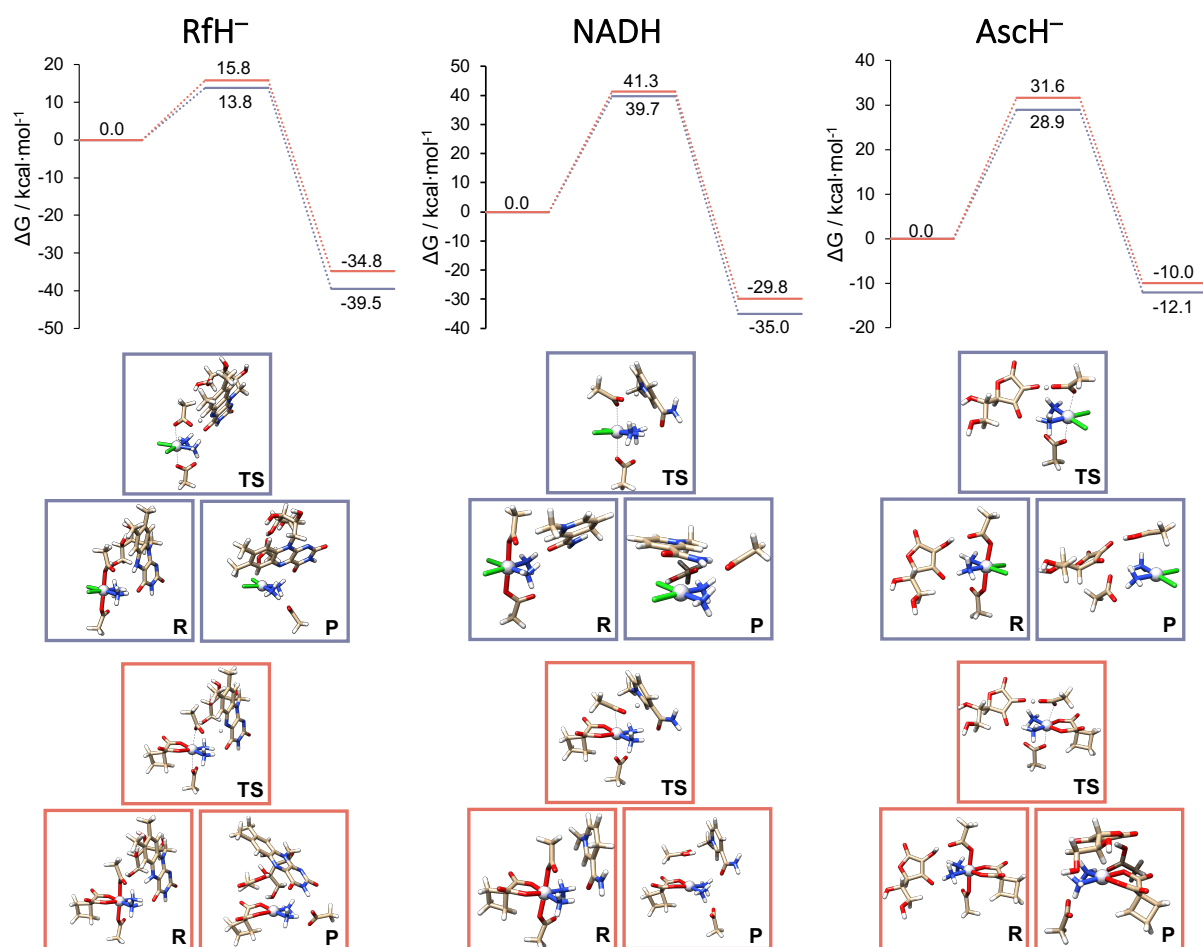

**Fig. S5** Free energy profiles describing the ligand-bridged-H-transfer mechanism for the reduction of complexes **1** (violet) and **2** (red) by RfH<sup>-</sup>, NADH and AscH<sup>-</sup>. Models of initial adduct (R), transition state (TS) and product (P) were obtained assuming that the carbonyl O(2) atom of an axial acetato ligands of **1** and **2** interacts with the hydride donating moiety of the donor. Relative energies are expressed in kcal mol<sup>-1</sup> and calculated with respect to the zero-reference energy of the initial adduct (in the singlet ground state).

## References

- 1 J. Gurruchaga-Pereda, V. Martínez-Martínez, E. Rezabal, X. Lopez, C. Garino, F. Mancin, A. L. Cortajarena and L. Salassa, *ACS Catal.*, 2020, **10**, 187–196.
